- artificial kidney system. *Trans Am Soc Artif Intern Organs* 1975; 21: 108–116
22. Mucsi I, Hercz G, Uldall R *et al.* Control of serum phosphate without any phosphate binders in patients treated with nocturnal hemodialysis. *Kidney Int* 1998; 53: 1399–1404
  23. Ward RA, Greene T, Hartmann B *et al.* Resistance to intercompartmental mass transfer limits beta2-microglobulin removal by post-dilution hemodiafiltration. *Kidney Int* 2006; 69: 1431–1437
  24. Odell RA, Slowiaczek P, Moran JE *et al.* Beta 2-microglobulin kinetics in end-stage renal failure. *Kidney Int* 1991; 39: 909–919
  25. Raj DS, Ouwendyk M, Francoeur R *et al.* Beta(2)-microglobulin kinetics in nocturnal haemodialysis. *Nephrol Dial Transplant* 2000; 15: 58–64
  26. Okuno S, Ishimura E, Kohno K *et al.* Serum beta2-microglobulin level is a significant predictor of mortality in maintenance haemodialysis patients. *Nephrol Dial Transplant* 2009; 24: 571–577
  27. Cheung AK, Rocco MV, Yan G *et al.* Serum beta-2 microglobulin levels predict mortality in dialysis patients: results of the HEMO study. *J Am Soc Nephrol* 2006; 17: 546–555
  28. Schiffl H, Lang SM, Fischer R. Ultrapure dialysis fluid slows loss of residual renal function in new dialysis patients. *Nephrol Dial Transplant* 2002; 17: 1814–1818
  29. Schiffl H, Lang SM, Stratakis D *et al.* Effects of ultrapure dialysis fluid on nutritional status and inflammatory parameters. *Nephrol Dial Transplant* 2001; 16: 1863–1869
  30. Ledebro I. What limits the expansion of self-care dialysis at home? *Hemodial Int* 2008; 12 (Suppl 1): S55–S60
  31. Lockridge RS, Jr, Moran J. Short daily hemodialysis and nocturnal hemodialysis at home: practical considerations. *Semin Dial* 2008; 21: 49–53

Received for publication: 19.6.2012; Accepted in revised form: 29.8.2012

*Nephrol Dial Transplant* (2013) 28: 1264–1275  
doi: 10.1093/ndt/gft053  
Advance Access publication 29 March 2013

## Global differences in dialysis modality mix: the role of patient characteristics, macroeconomics and renal service indicators

Moniek W.M. van de Luijtgarden<sup>1</sup>,  
Kitty J. Jager<sup>1</sup>,  
Vianda S. Stel<sup>1</sup>,  
Anneke Kramer<sup>1</sup>,  
Ana Cusumano<sup>2</sup>,  
Robert F. Elliott<sup>3</sup>,  
Claudia Geue<sup>4</sup>,  
Alison M. MacLeod<sup>5</sup>,  
Benedicte Stengel<sup>6,7</sup>,  
Adrian Covic<sup>8</sup>  
and Fergus J. Caskey<sup>9,10</sup>

<sup>1</sup>ERA–EDTA Registry, Department of Medical Informatics, Academic Medical Center, University of Amsterdam, Amsterdam, The Netherlands,

<sup>2</sup>Sociedad Latinoamericana de Nefrología e Hipertensión, Latin America and Centro de Educación Médica e Investigaciones Clínicas University Institute, Buenos Aires, Argentina,

<sup>3</sup>Health Economics Research Unit, University of Aberdeen, Aberdeen, UK,

<sup>4</sup>Health Economics & Health Technology Assessment Institute for Health & Wellbeing, Glasgow, UK,

<sup>5</sup>Section of Population Health, School of Medicine and Dentistry, University of Aberdeen, Aberdeen, UK,

<sup>6</sup>Inserm, CESP Centre for research in Epidemiology and Population Health, U1018, Epidemiology of Diabetes, Obesity, and Kidney Diseases Team, Villejuif, France,

<sup>7</sup>Université Paris Sud 11, UMRS 1018, Villejuif F-94807, France,

<sup>8</sup>Societatea Romana de Nefrologie and University of Medicine ‘Gr T Popa’, Iasi, Romania,

<sup>9</sup>Richard Bright Renal Unit, Bristol, UK and

<sup>10</sup>The School of Clinical Sciences, University of Bristol, Bristol, UK

Correspondence and offprint requests to: Moniek W.M. van de Luijtgarden; Email: m.w.vandeluijtgarden@amc.nl

Keywords: dialysis, epidemiology, health policy, macroeconomics

## ABSTRACT

**Background.** An increase in the dialysis programme expenditure is expected in most countries given the continued rise in the number of people with end-stage renal disease (ESRD) globally. Since chronic peritoneal dialysis (PD) therapy is relatively less expensive compared with haemodialysis (HD) and because there is no survival difference between PD and HD, identifying factors associated with PD use is important.

**Methods.** Incidence counts for the years 2003–05 were available from 36 countries worldwide. We studied associations of population characteristics, macroeconomic factors and renal service indicators with the percentage of patients on PD at Day 91 after starting dialysis. With linear regression models, we obtained relative risks (RRs) with 95% confidence intervals (CIs).

**Results.** The median percentage of incident patients on PD was 12% (interquartile range: 7–26%). Determinants independently associated with lower percentages of patients on PD were as follows: patients with diabetic kidney disease (per 5% increase) (RR 0.93; 95% CI 0.89–0.97), health expenditure as % gross domestic product (per 1% increase) (RR 0.93; 95% CI 0.87–0.98), private-for-profit share of HD facilities (per 1% increase) (RR 0.996; 95% CI 0.99–1.00;  $P = 0.04$ ), costs of PD consumables relative to staffing (per 0.1 increase) (RR 0.97; 95% CI 0.95–0.99).

**Conclusions.** The factors associated with a lower percentage of patients on PD include higher diabetes prevalence, higher healthcare expenditures, larger share of private-for-profit centres and higher costs of PD consumables relative to staffing. Whether dialysis modality mix can be influenced by changing healthcare organization and funding requires additional studies.

## INTRODUCTION

Renal replacement therapy (RRT) is an expensive therapy, accounting for ~1–2% of healthcare spending in high-income countries [1]. With the rising incidence and prevalence of treated end-stage renal disease (ESRD), expenditures on dialysis will increase putting more pressure on dialysis capacity and health budgets [2–4].

With the exception of highly comorbid patients, there is no clear survival benefit for either haemodialysis (HD) or peritoneal dialysis (PD) [5–11]. In most countries, PD is a cheaper modality than HD, as it has lower overhead costs for buildings, equipment and labour [1, 12, 13]. Studies evaluating potential cost savings from increasing the share of PD have concluded that a higher proportion of patients on PD are associated with substantial annual savings and an increased dialysis capacity. Therefore, a greater share of patients on PD would allow more patients to receive dialysis for the same budget [14–16]. So why does HD account for the lion's share of initial dialysis modality in most countries?

Several investigations have already addressed this question and concluded that the decision to start RRT with either HD or PD is influenced (besides medical superiority in some

patient groups) by patient and physician preference and by macroeconomic factors including economic structures at a national or centre level, national wealth and cost differences between the two dialysis modalities [1, 17–26]. Unfortunately, these previous studies have been rather descriptive in nature, have focussed on a very small number of countries or have relied on crude results only. The current international study aims to identify specific medical factors (dialysis population characteristics) and non-medical factors (macroeconomic factors and renal service indicators) that, adjusted for known confounders, are associated with the country-specific percentage of patients on PD at Day 91 after initiating RRT.

## METHODS

### Data collection

This study is part of the EVEREST study (Explaining the Variation in Epidemiology of RRT through Expert opinion, Secondary data sources and Trends over time), including 46 of the 51 national renal registries worldwide known to have reported validated data on RRT [27]. The EVEREST study started in 2008, aiming to investigate the detailed interplay between economic characteristics of countries and their incidence of RRT, dialysis modality mix and mortality on dialysis [28, 29]. For this analysis focusing on dialysis modality mix, we use country-level data from  $n = 36$  renal registries that were able to provide incidence counts stratified by modality type over the time period 2003–05 [Africa (Tunisia), Asia (Israel, Japan, Malaysia, The Republic of Korea, Taiwan, Thailand, Turkey), Australasia (Australia and New Zealand), Europe (Austria, Belgium, Bosnia-Herzegovina, Croatia, Czech Republic, Denmark, Finland, France, FYR of Macedonia, Germany, Greece, Iceland, Italy, Luxembourg, Netherlands, Norway, Romania, Slovenia, Spain, Sweden and UK), North America (Canada and USA) and South America (Chile, Uruguay and Venezuela)]. Macroeconomic indicators were collected from the OECD and WHO; a description of the variable and the source is included in Box 1. The renal service organization indicators were collected using a survey among experts in renal services. All these variables concerned the period 2003–05. A more extensive description of this study is presented elsewhere [27].

### Modality mix as outcome measure

The outcome measure representing dialysis modality mix was the percentage of dialysis patients on PD at Day 91 after the initiation of RRT. This day was chosen for the assessment of the dialysis modality of choice as some patients receive HD for a short period, while preparations are made for PD. For the Republic of Korea, Day 30 was used due to the unavailability of Day 91 data.

### Potential determinants of modality mix

The selection of potential determinants of modality mix and the development of a theoretical framework for defining our prior rationales (Figure 1) were based on a review of the

| Box 1: Description and source of the macroeconomic factors                                                                                                                                                                                                                                                                                                                                                                                                                                                                                                                                                                                                                                                                                                                                                                                                                                                                       |                                                                                                                                                                                                                                                                |                                                                                                                                                                             |
|----------------------------------------------------------------------------------------------------------------------------------------------------------------------------------------------------------------------------------------------------------------------------------------------------------------------------------------------------------------------------------------------------------------------------------------------------------------------------------------------------------------------------------------------------------------------------------------------------------------------------------------------------------------------------------------------------------------------------------------------------------------------------------------------------------------------------------------------------------------------------------------------------------------------------------|----------------------------------------------------------------------------------------------------------------------------------------------------------------------------------------------------------------------------------------------------------------|-----------------------------------------------------------------------------------------------------------------------------------------------------------------------------|
| Macroeconomic factor                                                                                                                                                                                                                                                                                                                                                                                                                                                                                                                                                                                                                                                                                                                                                                                                                                                                                                             | Description                                                                                                                                                                                                                                                    | Source                                                                                                                                                                      |
| HDI                                                                                                                                                                                                                                                                                                                                                                                                                                                                                                                                                                                                                                                                                                                                                                                                                                                                                                                              | The United Nations Development Programme HDI combines indicators of life expectancy, education and income to create a validated composite score of a nations state of development.                                                                             | The Human Development Report team. Human Development Indicators per country. <sup>1</sup>                                                                                   |
| GDP per capita                                                                                                                                                                                                                                                                                                                                                                                                                                                                                                                                                                                                                                                                                                                                                                                                                                                                                                                   | Gross domestic product per capita is a measure of national wealth. Data have been collected in USD.                                                                                                                                                            | International Monetary Fund (IMF): World Economic Outlook Database, April 2008. <sup>2</sup>                                                                                |
| Health expenditure as % GDP                                                                                                                                                                                                                                                                                                                                                                                                                                                                                                                                                                                                                                                                                                                                                                                                                                                                                                      | Percentage of gross domestic product (i.e. national wealth) spent on healthcare.                                                                                                                                                                               | WHO HFA database for EU countries. <sup>3</sup><br>OECD Health Database for OECD countries. <sup>4</sup><br>WHOSIS database for non-EU and non-OECD countries. <sup>5</sup> |
| Public share of healthcare expenditure                                                                                                                                                                                                                                                                                                                                                                                                                                                                                                                                                                                                                                                                                                                                                                                                                                                                                           | Public expenditure as a percentage of total expenditure on healthcare.                                                                                                                                                                                         | WHO HFA database for EU countries. <sup>3</sup><br>OECD Health Database for OECD countries. <sup>4</sup><br>World Bank HNP Stats for remaining countries. <sup>6</sup>      |
| Responsiveness index                                                                                                                                                                                                                                                                                                                                                                                                                                                                                                                                                                                                                                                                                                                                                                                                                                                                                                             | This is a composite indicator of healthcare system performance developed by the WHO, with elements capturing respect for dignity, confidentiality, autonomy, prompt attention, quality of amenities, access to social support networks and choice of provider. | WHO: The World Health Report 2000 Health Systems: Improving performance. Geneva, Switzerland: World Health Organization; 2000 <sup>7</sup> .                                |
| <sup>1</sup> <a href="http://www.hdr.undp.org">http://www.hdr.undp.org</a> .<br><sup>2</sup> <a href="http://www.imf.org/external/pubs/ft/weo/2008/01/weodata/index.aspx">http://www.imf.org/external/pubs/ft/weo/2008/01/weodata/index.aspx</a> .<br><sup>3</sup> <a href="http://data.euro.who.int/hfad/">http://data.euro.who.int/hfad/</a> .<br><sup>4</sup> <a href="http://stats.oecd.org/Index.aspx">http://stats.oecd.org/Index.aspx</a> .<br><sup>5</sup> <a href="http://apps.who.int/gho/indicatorregistry/App_Main/view_indicator.aspx?iid=3104">http://apps.who.int/gho/indicatorregistry/App_Main/view_indicator.aspx?iid=3104</a> .<br><sup>6</sup> <a href="http://datatopics.worldbank.org/hnp/topic/health-financing">http://datatopics.worldbank.org/hnp/topic/health-financing</a> .<br><sup>7</sup> <a href="http://www.who.int/whr/2000/en/whr00_en.pdf">http://www.who.int/whr/2000/en/whr00_en.pdf</a> . |                                                                                                                                                                                                                                                                |                                                                                                                                                                             |

literature. We hypothesized that the macroeconomic factors indirectly influenced the proportion of PD patients either by influencing RRT incidence or by influencing the renal service organization. Our prior hypotheses for the determinants are stated in Table 2.

### Statistical analyses

First, we obtained descriptive statistics for all countries and calculated medians and interquartile ranges (IQRs) for continuous determinants or the percentages for categorical variables. Thereafter, with linear regression analyses we studied associations between the potential determinants (i.e. patient characteristics, macroeconomic factors and renal service indicators) and the percentage of incident patients on PD. Since this outcome measure can only take positive values and our data were skewed [with several countries having a very low percentage of PD patients (Figure 2)], we log-transformed this measure. After log transformation, all criteria for linear regression analysis were met. The estimated regression coefficients were subsequently converted back to the original scale and could be interpreted as relative risks (RRs).

To evaluate the independence of each association, we constructed multivariable linear regression models for each

determinant adjusting for variables that satisfied the criteria for confounding [30]. With a number of 36 observations, we were able to include a maximum of four covariates in each model, i.e. the determinant and the three strongest confounders [31]. We assessed the strength of each confounder by calculating the subsequent change in the estimated coefficient of the determinant after including the confounder in the model. Covariates that caused <10% change in the coefficient of the determinant were not considered as potential confounders. We also excluded confounders that were collinear with the determinant as assessed after examining the tolerance and variance inflation factor [32]. Analyses were performed using SPSS version 16.0 (SPSS Inc., Chicago, Illinois). The P-values <0.05 were considered statistically significant.

### Sensitivity analyses

For a sensitivity analysis, we excluded the FYR of Macedonia and Luxembourg as they had very low percentages of PD patients. Since the effects could differ according to the state of economic and social development, models were also analysed separately for high and low human development index (HDI) countries, i.e. above or below the calculated median HDI. Also, we repeated analyses for patients below

**Table 1: Characteristics of the study population for all countries and by quartiles of % PD use**

|                                                                                                                  |                                                             | PD quartile 1 <sup>A</sup> ,<br>0–7.2%    | PD quartile 2 <sup>B</sup> ,<br>7.2–11.9% | PD quartile 3 <sup>C</sup> ,<br>11.9–26.0% | PD quartile 4 <sup>D</sup> ,<br>26–49.2%  |
|------------------------------------------------------------------------------------------------------------------|-------------------------------------------------------------|-------------------------------------------|-------------------------------------------|--------------------------------------------|-------------------------------------------|
|                                                                                                                  | Median (IQR) <sup>a</sup> all<br>countries ( <i>n</i> = 36) | Median (IQR) <sup>a</sup><br><i>n</i> = 9 | Median (IQR) <sup>a</sup><br><i>n</i> = 9 | Median (IQR) <sup>a</sup><br><i>n</i> = 9  | Median (IQR) <sup>a</sup><br><i>n</i> = 9 |
| <b>Incident RRT patients characteristics</b>                                                                     |                                                             |                                           |                                           |                                            |                                           |
| Percentage of dialysis population aged 65+ years (%)                                                             | 49.8 (41.3–55.8)                                            | 43.2 (36.0–64.6)                          | 48.5 (34.7–51.7)                          | 54.9 (41.5–61.0)                           | 49.8 (44.1–53.8)                          |
| Percentage diabetes as primary renal disease (%)                                                                 | 29.0 (21.3–37.5)                                            | 30.0 (21.2–37.0)                          | 33.2 (25.7–43.4)                          | 23.2 (16.7–32.7)                           | 24.9 (17.8–37.8)                          |
| <b>Macroeconomic factors</b>                                                                                     |                                                             |                                           |                                           |                                            |                                           |
| HDI                                                                                                              | 0.94 (0.85–0.95)                                            | 0.87 (0.79–0.94)                          | 0.90 (0.83–0.94)                          | 0.95 (0.87–0.96)                           | 0.95 (0.94–0.96)                          |
| GDP per capita (per 1000 USD)                                                                                    | 23.9 (5.9–35.0)                                             | 5.99 (2.55–33.6)                          | 14.9 (4.6–27.3)                           | 29.0 (12.6–33.2)                           | 35.3 (27.8–41.5)                          |
| Health expenditure as % GDP (%)                                                                                  | 8.5 (7.3–9.7)                                               | 7.8 (5.58–8.3)                            | 8.7 (5.5–10.0)                            | 8.6 (7.5–9.8)                              | 9.0 (7.8–9.2)                             |
| Public share of healthcare expenditure (%)                                                                       | 76.0 (62.0–82.0)                                            | 78.0 (56.5–89.5)                          | 48.0 (44.3–76.8)                          | 72.0 (70.5–82.0)                           | 78.0 (66.0–84.5)                          |
| Responsiveness Index                                                                                             | 6.7 (5.8–6.9)                                               | 5.81 (5.08–7.05)                          | 6.1 (5.5–6.7)                             | 6.7 (5.8–6.9)                              | 6.8 (6.6–6.9)                             |
| <b>Renal service indicators</b>                                                                                  |                                                             |                                           |                                           |                                            |                                           |
| The private-for-profit share of HD facilities (%)                                                                | 23.3 (0.0–47.9)                                             | 48.0 (0–76.9)                             | 36 (23.3–62.5)                            | 20.0 (1.0–45.5)                            | 0 (0–19)                                  |
| Number of nephrologists WTE (pmp)                                                                                | 11.6 (7.3–20.2)                                             | 7.42 (4.99–17.90)                         | 20.1 (8.4–32.5)                           | 11.7 (10.1–25.1)                           | 11.1 (7.3–15.8)                           |
| Number of incident patients per WTE nephrologist                                                                 | 10.3 (7.5–18.3)                                             | 11.9 (9.7–26.9)                           | 8.0 (3.5–18.1)                            | 8.6 (4.5–15.2)                             | 9.5 (7.1–17.5)                            |
| Number of dialysis centres (pmp)                                                                                 | 9.0 (5.9–13.1)                                              | 11.8 (7.6–14.2)                           | 11.5 (8.3–15.3)                           | 9.1 (5.4–15.5)                             | 3.9 (3.4–8.6)                             |
| Transplant availability <sup>b</sup>                                                                             | 14.8 (6.3–22.6)                                             | 4.7 (1.5–8.7)                             | 12.3 (6.5–19.3)                           | 15.5 (8.4–70.5)                            | 22.2 (18.7–37.2)                          |
| Cost of PD consumables relative to GDP per capita (per patient per year as a proportion of GDP per capita)       | 0.86 (0.51–1.14)                                            | 1.16 (0.73–1.72)                          | 0.98 (0.50–1.05)                          | 0.76 (0.53–1.16)                           | 0.68 (0.31–1.08)                          |
| Cost of PD consumables relative to staffing (per patient per year as a proportion of senior nurse annual salary) | 0.57 (0.33–0.96)                                            | 1.13 (0.45–1.54)                          | 0.70 (0.45–1.05)                          | 0.42 (0.33–0.69)                           | 0.37 (0.15–0.58)                          |
| Cost of senior nurse (annual salary as a proportion of GDP per capita)                                           | 1.48 (1.16–1.83)                                            | 1.24 (1.10–1.52)                          | 1.16 (0.98–1.53)                          | 1.47 (1.20–2.21)                           | 1.84 (1.65–2.11)                          |

|                                                                              |                  |                  |                  |                  |                  |
|------------------------------------------------------------------------------|------------------|------------------|------------------|------------------|------------------|
| Salary of salaried nephrologist (per year as a proportion of GDP per capita) | 2.99 (2.01–4.34) | 2.30 (1.49–3.10) | 2.67 (1.71–3.33) | 3.35 (1.84–5.74) | 4.07 (3.14–5.61) |
| HD facility reimbursement method                                             |                  |                  |                  |                  |                  |
| Activity based                                                               | 72.2%            | 66.7%            | 78%              | 100%             | 44%              |
| Global budget only                                                           | 25.0%            | 33.3%            | 22%              | 0%               | 44%              |
| Other ( <i>n</i> = 1; not specified)                                         | 2.8%             | 0%               | 0%               | 0%               | 11%              |
| HD facility reimbursement rate (per year as a proportion of GDP per capita)  | 1.22 (0.87–1.85) | 1.21 (0.97–1.59) | 1.02 (0.75–1.97) | 1.60 (1.09–1.97) | 1.42 (0.72–1.84) |
| PD facility reimbursement rate (per year as a proportion of GDP per capita)  | 1.00 (0.69–1.36) | 1.51 (0.53–1.79) | 0.71 (0.13–0.95) | 1.04 (0.79–1.34) | 1.04 (0.88–1.31) |
| Reimbursement rate for HD relative to PD                                     | 1.27 (0.93–1.67) | 0.83 (0.74–1.00) | 1.33 (0.93–2.40) | 1.54 (1.32–1.77) | 1.26 (0.78–1.58) |

A: Bosnia-Herzegovina, Chile, Czech Republic, FYR of Macedonia, Germany, Japan, Luxembourg, Thailand, Tunisia. B: Austria, Croatia, Greece, Malaysia, Slovenia, Taiwan, USA, Uruguay, Venezuela. C: Belgium, Canada, France, Israel, Italy, Norway, Romania, Spain, Turkey. D: Australia, Denmark, Finland, Iceland, Netherlands, New-Zealand, Republic of Korea, Sweden, UK. GDP per capita, gross domestic product per capita; WTE, whole time equivalent; pmp, per million population.

<sup>a</sup>Percentages in the case of categorical variables.

<sup>b</sup>Data available for 23 countries.

and above 65 years of age. Finally, we adjusted models for the percentage of diabetes as primary renal disease and transplant availability by including these as additional confounders in the original models. This was considered worthwhile on the grounds that countries with a high transplantation rate may be more likely to start patients on PD (because they know that the patient is likely to be transplanted before the technique becomes less effective). Transplant availability was defined as the total number of kidney transplants performed in 2004, divided by the number of prevalent dialysis patients (data from 23 countries).

## RESULTS

### Baseline country characteristics

The median percentage of incident patients on PD at Day 91 after the initiation of RRT was 12% (IQR 7–26%), with values ranging from 0% for Luxembourg and 2% for FYR Macedonia to 49% in New Zealand (Figure 2). The baseline characteristics of our study population are presented in Table 1, for all countries combined and by quartiles of % PD use, while complete data per country are shown in Supplementary data, Table S1. Large differences in gross domestic product (GDP) per capita were found between countries, ranging from <2600 USD in Thailand, Bosnia-Herzegovina and FYR of Macedonia to >45 000 USD in Iceland, Norway and Luxembourg (Table 1). The private-for-profit share of HD facilities was 0% in ten countries, while it was >75% in five (Supplementary data, Table S1).

## DETERMINANTS OF MODALITY CHOICE

### Theoretical framework

We developed a theoretical framework (Figure 1) to select the potential determinants of interest out of all incident patient characteristics, macroeconomic factors and the renal service indicators and for defining our prior rationales (Table 2).

### Incident patient characteristics

The results of the linear regression analyses are presented in Table 3. In the crude analyses, none of the incident patient characteristics were associated with the percentage of patients on PD at Day 91. After adjustment for the responsiveness index, relative costs of PD consumables as % GDP per capita and costs of PD consumables relative to staffing, we found that diabetes is relevant for predicting the PD share: each 5% increase in the percentage of RRT patients with diabetic nephropathy was significantly associated with a 7% decrease of the percentage of patients on PD at Day 91 [RR 0.93; 95% confidence interval (CI) 0.89–0.97; *P* = 0.001].

### Macroeconomic factors

Only GDP per capita was associated with the percentage of patients starting on PD in the crude analyses: for each 1000 USD increase in GDP per capita, the percentage of patients

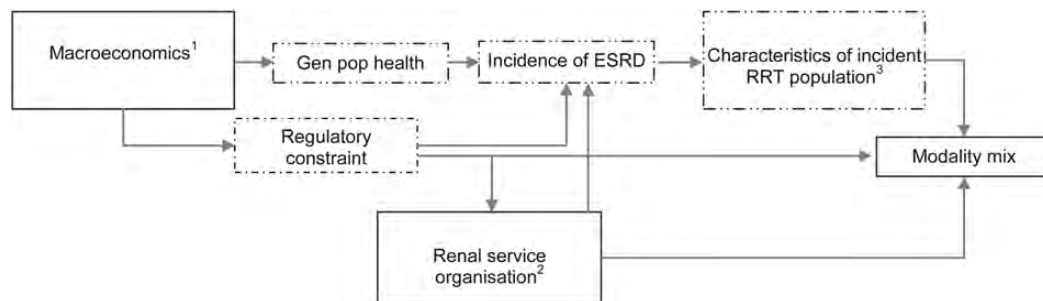

**FIGURE 1:** Theoretical framework and the classification of the determinants. Determinants included in the models; (i) GDP per capita, Health expenditure as % GDP, public share of healthcare expenditure; (ii) the private-for-profit share of HD facilities, number of dialysis centres pmp, cost of PD consumables relative to staffing, reimbursement rate for HD relative to PD; (iii) percentage of dialysis population aged 65 + years, percentage diabetes as primary renal disease.

starting on PD increased by 1%. However, the impact of GDP per capita is complex: the above association lost its significance after adjusting for the private-for-profit share of HD facilities, relative costs of PD consumables and relative staffing costs of a senior nurse. Multivariable analyses revealed at the same time an independent relationship between the percentage of GDP per capita spent on healthcare and PD use: each 1% increase was associated with a 7% lower percentage of patients starting on PD (RR 0.93; 95% CI 0.87–0.98;  $P = 0.013$ ).

### Renal service indicators

In crude analyses, three determinants were associated with a lower percentage of patients starting on PD: the private-for-profit share of HD facilities, the costs of PD consumables relative to staffing and the number of HD centres per million population (pmp). The private-for-profit share of HD facilities and the costs of PD consumables relative to staffing remained statistically significant in the multivariable analyses. For the private-for-profit share of HD facilities, each 1% increase was associated with a 0.4% decrease in PD use (RR 0.996; 95% CI 0.99–1.00,  $P = 0.04$ ). After adjusting for HDI and GDP per capita, every 0.1 increase in the costs of PD consumables relative to staffing resulted in a 3% decrease in the percentage of patients on PD at Day 91, (RR 0.97; 95% CI 0.95–0.99;  $P = 0.015$ ).

### Explained variance

There were four determinants for which we found independent associations with the percentage of patients on PD: the percentage of incident patients with diabetes as primary renal disease, the percentage of GDP per capita spent on healthcare, the private-for-profit share of HD facilities and the costs of PD consumables relative to staffing. Together they explained 69% of the variance in PD use across countries.

### SENSITIVITY ANALYSES

After excluding those countries with a very low PD use (i.e. FYR of Macedonia and Luxembourg) from the analyses, the results remained similar. Nor did the results differ after

examining the low and high HDI countries separately, examining the European and non-European countries separately or after adjusting the original models for transplant availability and the percentage of diabetes as primary renal disease.

### DISCUSSION

In this study examining 36 countries worldwide, we were able to study for the first time independent associations between PD use and incident dialysis characteristics, macroeconomic factors and renal service indicators. We showed that a higher percentage of incident patients with diabetes as primary renal disease, a higher percentage of GDP per capita spent on healthcare, a higher share of private-for-profit centres and higher costs of PD consumables relative to staffing were independently associated with a lower percentage of patients starting on PD.

We found an association between the percentage of patients with diabetic nephropathy and the percentage of patients on PD. Most studies reported poorer outcomes on PD when compared with HD for patients with diabetic kidney disease [33–36]. The presence of a negative association between the percentage of incident patients with diabetic kidney disease and the percentage receiving PD on Day 91, therefore, may reflect clinical practices aimed at avoiding PD in patients with diabetic nephropathy. Alternatively, diabetic kidney disease may act as a surrogate for other comorbidities [37, 38]. However, a study by Mehrotra *et al.* reported decreased PD use in the USA from 11% in 1996–97 to 7% in 2002–03. This decline was independent of age, comorbidity burden and body size of the incident dialysis population. Adjusting for case-mix and laboratory data did not change their results [39], suggesting that other factors like macroeconomic factors and renal service indicators may influence the incidence of PD.

There are two possible explanations for the association between the high healthcare expenditure as a percentage of GDP per capita and the lower percentage of patients on PD. As shown in the theoretical framework (Figure 1), one possible pathway involves regulatory constraints. As an example of such constraints, countries spending more on healthcare may

**Table 2: A priori hypotheses for the models included in the study**

| Model                                                                                                                                                                                                                                                                                                                                                                                                                                                                                                                                                                                                                                                                                                                                                                                     | Determinant                                                                                                                 | A priori hypothesis                                                                                                                                                                                                                                                                                                                                                                                                                             |
|-------------------------------------------------------------------------------------------------------------------------------------------------------------------------------------------------------------------------------------------------------------------------------------------------------------------------------------------------------------------------------------------------------------------------------------------------------------------------------------------------------------------------------------------------------------------------------------------------------------------------------------------------------------------------------------------------------------------------------------------------------------------------------------------|-----------------------------------------------------------------------------------------------------------------------------|-------------------------------------------------------------------------------------------------------------------------------------------------------------------------------------------------------------------------------------------------------------------------------------------------------------------------------------------------------------------------------------------------------------------------------------------------|
| Incident patients characteristics                                                                                                                                                                                                                                                                                                                                                                                                                                                                                                                                                                                                                                                                                                                                                         |                                                                                                                             |                                                                                                                                                                                                                                                                                                                                                                                                                                                 |
| A                                                                                                                                                                                                                                                                                                                                                                                                                                                                                                                                                                                                                                                                                                                                                                                         | Percentage of dialysis population aged 65+ years                                                                            | Increasing age is associated with lower rates of PD use in some countries [59, 60] and higher rates in others [53]. As more countries tend to provide HD to their elderly patients, we hypothesized that the percentage of PD patients will be lower when the percentage of patients >65 is higher.                                                                                                                                             |
| B                                                                                                                                                                                                                                                                                                                                                                                                                                                                                                                                                                                                                                                                                                                                                                                         | Percentage diabetes as primary renal disease                                                                                | Patients with diabetes mellitus have worse survival on PD when compared with HD so percentage of PD patients is hypothesized to decrease with a larger share of patients with diabetes mellitus. In addition, DM may be considered as a surrogate for comorbidity?                                                                                                                                                                              |
| Macroeconomic indicators                                                                                                                                                                                                                                                                                                                                                                                                                                                                                                                                                                                                                                                                                                                                                                  |                                                                                                                             |                                                                                                                                                                                                                                                                                                                                                                                                                                                 |
| C                                                                                                                                                                                                                                                                                                                                                                                                                                                                                                                                                                                                                                                                                                                                                                                         | GDP per capita                                                                                                              | Patients in richer countries may have better education systems, housing and medical supplies to enable HD. GDP per capita has been shown to be associated with the rate of diffusion of medical technologies, including HD [46].                                                                                                                                                                                                                |
| D                                                                                                                                                                                                                                                                                                                                                                                                                                                                                                                                                                                                                                                                                                                                                                                         | Health expenditure as % GDP                                                                                                 | Countries spending a smaller proportion of GDP on healthcare are likely to have more control over introduction and expansion of new and expensive technologies [61]. Increasing healthcare expenditure may then result in less control over expansion of HD facilities and less patients may be treated with PD.                                                                                                                                |
| E                                                                                                                                                                                                                                                                                                                                                                                                                                                                                                                                                                                                                                                                                                                                                                                         | Public share of healthcare expenditure                                                                                      | The proportion of total healthcare spending that is public (i. e. from taxes or compulsory social insurance) has been suggested to be a proxy for the level of regulatory constraint on adopting and expanding new medical technologies. Countries where the public sector purchases most medical goods may more easily implement cost-control strategies. Constraint on expansion of HD facilities may have increased the rate of PD use [46]. |
| Renal service indicators                                                                                                                                                                                                                                                                                                                                                                                                                                                                                                                                                                                                                                                                                                                                                                  |                                                                                                                             |                                                                                                                                                                                                                                                                                                                                                                                                                                                 |
| F                                                                                                                                                                                                                                                                                                                                                                                                                                                                                                                                                                                                                                                                                                                                                                                         | The private-for-profit share of HD facilities                                                                               | PD utilization is lower in private-for-profit centres. With a higher share of private-for-profit centres, a lower percentage of PD patients can be expected [42, 62].                                                                                                                                                                                                                                                                           |
| G                                                                                                                                                                                                                                                                                                                                                                                                                                                                                                                                                                                                                                                                                                                                                                                         | Number of dialysis centres pmp                                                                                              | In systems with more freedom to set up new services, there will be more HD capacity with an economic need to maximize the use of that capacity rather than promote PD [1].                                                                                                                                                                                                                                                                      |
| H                                                                                                                                                                                                                                                                                                                                                                                                                                                                                                                                                                                                                                                                                                                                                                                         | Cost of PD consumables relative to staffing <sup>a</sup> (per patient per year as proportion of senior nurse annual salary) | Countries in which imported dialysis consumables are relatively more expensive than staffing costs (e.g. eastern Europe) will have lower rates of PD utilization [45].                                                                                                                                                                                                                                                                          |
| I                                                                                                                                                                                                                                                                                                                                                                                                                                                                                                                                                                                                                                                                                                                                                                                         | Reimbursement rate for HD relative to PD <sup>b</sup>                                                                       | PD is less expensive to provide than HD in developed countries (see H). If the difference in reimbursement for HD and PD is larger, then providing HD is more preferable than providing PD [45].                                                                                                                                                                                                                                                |
| <p>RRT, renal replacement therapy; GDP, gross domestic product; HD, haemodialysis; PD, peritoneal dialysis.</p> <p><sup>a</sup>PD consumables for one patient for 1 year, i.e. the amount a dialysis facility pays a pharmaceutical company, NOT what the dialysis facility is reimbursed for PD. Consumable costs should include dialysate fluid and lines but exclude drugs, staff costs, transport and overhead costs of running a hospital.</p> <p><sup>b</sup>The amount given should exclude reimbursement for transport to and from dialysis, medication (erythropoiesis-stimulating agents and bone/phosphate medication), vascular access. The amount should include any reimbursement of the nephrologist even if this occurs separately (i.e. direct to the nephrologist).</p> |                                                                                                                             |                                                                                                                                                                                                                                                                                                                                                                                                                                                 |

have fewer restrictions on adopting expensive technologies like HD, whereas when capital investment restrictions limit the expansion of in-centre HD infrastructure, home-based therapies like PD and home-HD are promoted [1]. Another possible explanation is that differences in access to treatment may be responsible for the influence of macroeconomic factors through the incidence of RRT (Figure 1). Previously, we showed that countries spending more on healthcare have higher ESRD treatment rates [28]; these higher take-on rates are likely to indicate that treatment is being offered to older, frailer, more comorbid patients who will be less suitable for PD [37, 38]. Additionally, physician preference may affect the proportion of patients on HD or PD [40].

We found an independent association between private-for-profit share of HD facilities and dialysis modality. This may be a direct influence of the renal service indicator on dialysis modality mix or it may be that it is acting through the characteristics of the dialysis patients (Figure 1). As suggested by Castledine *et al.*, in a for-profit facility, the need to fill spaces can be considered as a main factor against PD use [41]. Additionally, several studies have shown that after adjusting for several patient characteristics, the percentage of patients on PD is lower in private-for-profit dialysis centres than in not-for-profit centres [21, 42–44].

We also found that an increase in the costs of PD consumables relative to staffing costs of a senior nurse resulted in a decreased percentage of patients starting on PD. This link has long been recognized and reflects the relative importance of staffing and consumables to the cost of providing HD and PD, particularly as PD consumables were for many years almost exclusively manufactured in high-income countries [1, 12, 13, 45].

For two determinants, we found a statistically significant association in the crude analyses that did not reach significance in the multivariable analyses: GDP per capita and the number of dialysis centres pmp. This stresses the importance of adjusting for country-specific factors like macroeconomic

factors and renal service indicators and further exploring the working mechanisms of suggested associations. Our prior rationale for including GDP per capita in the analyses was that patients in richer countries may have a better transport infrastructure, readier access to medical supplies to enable HD and a higher diffusion rate of HD [46]. After adjusting for the private-for-profit share of HD facilities and either the relative costs of PD consumables or the relative staffing costs of a senior nurse, our results did not support this hypothesis. As several studies suggested, other factors like patient preference, pre-dialysis educational deficits (i.e. if not all modalities are explained sufficiently to the patients), physician preference and HD capacity, may prevail above the social/housing situation of the patient [24, 47]. Considering the number of HD facilities pmp in a country, our prior hypothesis had been that a high number of HD centres may reflect less control by the health department or government on the expansion of HD facilities (and thus improved access to HD) leading to a lower percentage of patients treated with PD [1]. This association may be absent because other factors are prevailing such as the existing dialysis capacity, the attitudes of physicians towards PD [1, 40] or, as shown in this analysis, the private-for-profit share of HD facilities.

In contrast to the conclusions of a narrative review [23], our comparison at a country level showed no association between the total reimbursement rate for HD relative to PD and the percentage of patients on PD. It may be that there is only an association between reimbursement and dialysis modality when reimbursement directly affects the income of those most involved in decision-making, i.e. the nephrologists, but this is often not the case [48, 49]. In addition, reimbursements may not be a major determinant of dialysis modality distribution. This is supported by the findings of Mendelssohn, who reported no major shift in modality distribution when home dialysis fees were raised by the Ontario government in 1998 [50]. Nevertheless, this may be different in countries with a large proportion of private-for-profit

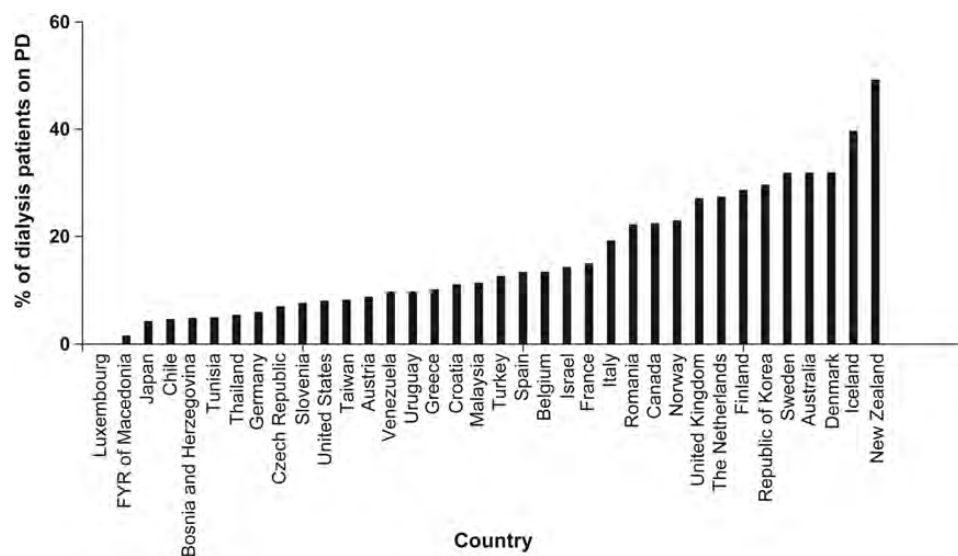

FIGURE 2: Distribution of the percentage of dialysis patients starting on PD at Day 91.



centres where financial incentives may be effective in influencing the dialysis modality distribution.

When examining the crude data for countries with high rates of PD use as shown in the Supplementary data, Table S1, we expected that determinants with significant positive associations would have higher values in the countries with lower PD use and vice versa. This did not turn out to be the case for all countries or all statistically significant determinants. We

therefore speculate that each country may have its own prevailing factors that overrule all other factors. First of all, the two dialysis modalities may not be available and affordable, at least in part as a result of specific policies of the government [51]. Such policies were not captured by our survey. For example, in some countries elderly and frailer patients are provided with assisted PD, whereas in many other countries HD would be the preferred dialysis treatment for these

**Table 3: Results of the univariable and multivariable analyses with proportion of dialysis patients on PD as the outcome variable**

| Model                                   | Variable of interest                                                                                                         | Univariable model |         | Adjusted for confounder | Multivariable model |         |
|-----------------------------------------|------------------------------------------------------------------------------------------------------------------------------|-------------------|---------|-------------------------|---------------------|---------|
|                                         |                                                                                                                              | RR (95% CI)       | P-value |                         | RR (95% CI)         | P-value |
| <b>Incident patient characteristics</b> |                                                                                                                              |                   |         |                         |                     |         |
| A                                       | Percentage of dialysis population aged 65+ (per 1% ↑)                                                                        | 1.00 (0.99–1.01)  | 0.663   | 4, 5, 9 <sup>a</sup>    | 1.00 (0.99–1.01)    | 0.880   |
| B                                       | Percentage diabetes as primary renal disease (per 5% ↑)                                                                      | 0.98 (0.93–1.03)  | 0.407   | 4, 6, 9 <sup>b</sup>    | 0.93 (0.89–0.97)    | 0.001   |
| <b>Macroeconomic indicators</b>         |                                                                                                                              |                   |         |                         |                     |         |
| C                                       | GDP per capita (per 1000 USD ↑)                                                                                              | 1.01 (1.01–1.02)  | 0.001   | 3, 6, 7                 | 1.00 (1.00–1.01)    | 0.702   |
| D                                       | Health expenditure as % GDP (per 1% ↑)                                                                                       | 1.02 (0.97–1.08)  | 0.456   | 1, 2, 4 <sup>c</sup>    | 0.93 (0.87–0.98)    | 0.013   |
| E                                       | Public share of healthcare expenditure (per 1% ↑)                                                                            | 1.00 (1.00–1.01)  | 0.223   | 1, 2, 3                 | 1.00 (0.99–1.00)    | 0.378   |
| <b>Renal service indicators</b>         |                                                                                                                              |                   |         |                         |                     |         |
| F                                       | The private-for-profit share of HD facilities (per 1% ↑)                                                                     | 0.99 (0.99–1.00)  | 0.004   | 1, 2                    | 0.996 (0.99–1.00)   | 0.040   |
| G                                       | Number of dialysis centres pmp (per 1.0 ↑)                                                                                   | 0.98 (0.96–0.99)  | 0.012   | 3                       | 0.98 (0.97–1.00)    | 0.100   |
| H                                       | Cost of PD consumables relative to staffing (per 0.1 ↑) (per patient per year as a proportion of senior nurse annual salary) | 0.96 (0.94–0.98)  | 0.000   | 1, 2                    | 0.97 (0.95–0.99)    | 0.015   |
| I                                       | Reimbursement rate for HD relative to PD                                                                                     |                   |         |                         |                     |         |
|                                         | Reimbursement PD ≤ HD                                                                                                        | 1 (reference)     |         |                         | 1 (reference)       |         |
|                                         | Reimbursement PD > HD                                                                                                        | 0.81 (0.64–1.02)  | 0.067   | 2                       | 0.86 (0.70–1.06)    | 0.144   |

CI, confidence interval; GDP, gross domestic product; USD, United States dollar; HD, haemodialysis; PD, peritoneal dialysis.

Only three strongest confounders were included in the models; other confounders were <sup>a</sup>7, <sup>b</sup>5, <sup>c</sup>7 & 9.

Potential confounders.

(1) HDI.

(2) GDP per capita.

(3) Private-for-profit share of HD facilities.

(4) Responsiveness index.

(5) Number of dialysis centres.

(6) Relative costs of PD consumables (per patient per year as a proportion of GDP per capita).

(7) Relative staffing costs of senior nurse.

(8) Salary of salaried nephrologist (per year as a proportion of GDP per capita).

(9) Cost of PD consumables relative to staffing (per patient per year as proportion of senior nurse annual salary).

patients. In the presence of such policies, nephrologists may apply different patient selection criteria because of the specific benefits and drawbacks of this type of PD [52, 53]. Another relevant factor may be the (dialysis) population density. If the population density is extremely low, patients live far from each other as well as from the centres, which makes it likely that the preferred dialysis modality will be PD; this has been shown by O'Hare *et al.* Although they found that centres in small remote rural areas were least likely to support PD and other home-based treatments, small remote rural areas appeared to have higher percentages of PD use on Day 90 when compared with urban areas, i.e. 17% versus 11% [54]. As there is no consensus on the definition of an urban area—each country has its own definition—we could not use this measure for our analysis. In addition to the examples mentioned above, there may be other determinants that explain why the independently associated factors will not always follow the expected pattern in all countries.

This study has a number of strengths. For the first time, we were able to study independent associations between PD use and incident dialysis characteristics, macroeconomic factors and renal service indicators, including all countries worldwide that had validated registry and macroeconomic data. The sensitivity analyses suggest that our findings are quite robust. However, when interpreting the results of this study, several limitations should be kept in mind. Information on several factors potentially associated with dialysis modality selection was lacking, among others educational deficits, physician bias, social mores and cultural habits and urbanization [24]. Moreover, we were not able to include extensive data on medical characteristics of the incident dialysis population other than the proportion of patients with diabetes mellitus as primary renal disease and the proportion of patients aged  $\geq 65$  years. Nevertheless, the explained variance of the four factors with statistically significant results in multivariable models was high at 69%. The percentage of patients with diabetes as primary renal disease was only available for the RRT instead of the dialysis population. We considered this a good approximation for the incident dialysis population as in most countries the preemptive transplantation rate is very low [55]. As only countries with renal registries and modality mix data could be included in analyses, the results may not be generalizable to all countries, particularly developing countries. Although with the countries as included in our study, we had a high geographical coverage, the absence of some expected associations may reflect the heterogeneity of our group of countries ( $n = 36$ ). Further, as each country could only contribute a single observation for each of the variables, it is important to recognize the risk of both type 2 error and ecological fallacy as we cannot be certain that the associations we found at the population level also apply at the individual patient level. Finally, our data concerned the period 2003–05, while some countries may have experienced changes in health policy, or other factors may have affected modality mix since the period of study. For example, Jain *et al.* showed that PD use from 1997 to 2008 declined by 5.3% in developed countries but did not change in developing countries [56]. Additionally, recent initiatives in the USA and the UK have set out to improve the

utilization of home dialysis (including PD) through a number of incentives, some of which are financial [57, 58].

In conclusion, a higher proportion of patients with diabetes mellitus as primary renal disease, increased healthcare expenditure as a percentage of GDP per capita, higher private-for-profit share of HD facilities and higher costs of PD consumables relative to staffing costs were all associated with a lower percentage of patients on PD at Day 91. While each country has its own prevailing factors influencing PD use, knowledge of the determinants of the percentage of patients on PD may be helpful in scenarios where the dialysis capacity needs to be expanded. Although the characteristics of the incident dialysis populations are clearly not modifiable without restricting access to treatment, the role of the three 'non-medical' factors suggests that it may be possible to influence the dialysis modality choice through healthcare organization and funding.

## SUPPLEMENTARY DATA

Supplementary data are available online at <http://ndt.oxfordjournals.org>.

## ACKNOWLEDGEMENTS

We are indebted to colleagues at each of the collaborating renal registries (listed in Appendix 1 in [27]) for their time, for providing the registry data and for assisting in the identification of suitable national experts. We also thank all the national experts (listed in Appendix 1 in [27]) for the considerable time and effort they have contributed to the study. Although these organizations and individuals have provided data for this study, the analyses, conclusions, opinions and statements expressed herein are those of the authors and do not necessarily reflect the opinions of collaborators.

## FUNDING

The EVEREST study is supported by the ERA-EDTA Quality European STudies (QUEST) Initiative. The study received official endorsement from the ERA-EDTA and the International Society of Nephrology (ISN).

## CONFLICT OF INTEREST STATEMENT

The authors declare that they have had no involvements that might raise the question of bias in the work reported or in the conclusions, implications or opinions stated. The results presented in this paper have not been published previously in whole or part, except in abstract format.

## REFERENCES

- De Vecchi AF, Dratwa M, Wiedemann ME. Healthcare systems and end-stage renal disease (ESRD) therapies—an international review: costs and reimbursement/funding of ESRD therapies. *Nephrol Dial Transplant* 1999; 14: 31–41
- Eggers PW. Has the incidence of end-stage renal disease in the USA and other countries stabilized? *Curr Opin Nephrol Hypertens* 2011; 20: 241–245
- Kramer A, Stel V, Zoccali C *et al.* An update on renal replacement therapy in Europe: ERA-EDTA Registry data from 1997 to 2006. *Nephrol Dial Transplant* 2009; 24: 3557–3566
- Schieppati A, Remuzzi G. Chronic renal diseases as a public health problem: epidemiology, social, and economic implications. *Kidney Int Suppl* 2005; 98: S7–S10
- Bloembergen WE, Port FK, Mauger EA *et al.* A comparison of mortality between patients treated with hemodialysis and peritoneal dialysis. *J Am Soc Nephrol* 1995; 6: 177–183
- Collins AJ, Hao W, Xia H *et al.* Mortality risks of peritoneal dialysis and hemodialysis. *Am J Kidney Dis* 1999; 34: 1065–1074
- Fenton SS, Schaubel DE, Desmeules M *et al.* Hemodialysis versus peritoneal dialysis: a comparison of adjusted mortality rates. *Am J Kidney Dis* 1997; 30: 334–342
- McDonald SP, Marshall MR, Johnson DW *et al.* Relationship between dialysis modality and mortality. *J Am Soc Nephrol* 2009; 20: 155–163
- van de Luitjgaarden MW, Noordzij M, Stel VS *et al.* Effects of comorbid and demographic factors on dialysis modality choice and related patient survival in Europe. *Nephrol Dial Transplant* 2011; 26: 2940–2947
- Quinn RR, Hux JE, Oliver MJ *et al.* Selection bias explains apparent differential mortality between dialysis modalities. *J Am Soc Nephrol* 2011; 22: 1534–1542
- Sens F, Schott-Pethelaz AM, Labeeuw M *et al.* Survival advantage of hemodialysis relative to peritoneal dialysis in patients with end-stage renal disease and congestive heart failure. *Kidney Int* 2011; 80: 970–977
- Berger A, Edelsberg J, Inglese GW *et al.* Cost comparison of peritoneal dialysis versus hemodialysis in end-stage renal disease. *Am J Manag Care* 2009; 15: 509–518
- Salonen T, Reina T, Oksa H *et al.* Cost analysis of renal replacement therapies in Finland. *Am J Kidney Dis* 2003; 42: 1228–1238
- Haller M, Gutjahr G, Kramar R *et al.* Cost-effectiveness analysis of renal replacement therapy in Austria. *Nephrol Dial Transplant* 2011; 26: 2988–2995
- Neil N, Guest S, Wong L *et al.* The financial implications for Medicare of greater use of peritoneal dialysis. *Clin Ther* 2009; 31: 880–888
- Sennfalt K, Magnusson M, Carlsson P. Comparison of hemodialysis and peritoneal dialysis—a cost-utility analysis. *Perit Dial Int* 2002; 22: 39–47
- Bass EB, Wills S, Fink NE *et al.* How strong are patients' preferences in choices between dialysis modalities and doses? *Am J Kidney Dis* 2004; 44: 695–705
- Blake PG. The complex economics of modality selection. *Perit Dial Int* 2004; 24: 509–511
- Dor A, Pauly MV, Eichleay MA *et al.* End-stage renal disease and economic incentives: the International Study of Health Care Organization and Financing (ISHCOF). *Int J Health Care Finance Econ* 2007; 7: 73–111
- Goovaerts T, Jadoul M, Goffin E. Influence of a pre-dialysis education programme (PDEP) on the mode of renal replacement therapy. *Nephrol Dial Transplant* 2005; 20: 1842–1847
- Horl WH, de AF, Williams PF. Healthcare systems and end-stage renal disease (ESRD) therapies—an international review: access to ESRD treatments. *Nephrol Dial Transplant* 1999; 14: 10–15
- Jung B, Blake PG, Mehta RL *et al.* Attitudes of Canadian nephrologists toward dialysis modality selection. *Perit Dial Int* 1999; 19: 263–268
- Just PM, de Charro FT, Tschosik EA *et al.* Reimbursement and economic factors influencing dialysis modality choice around the world. *Nephrol Dial Transplant* 2008; 23: 2365–2373
- Nissenson AR, Prichard SS, Cheng IK *et al.* ESRD modality selection into the 21st century: the importance of non-medical factors. *ASAIO J* 1997; 43: 143–150
- van Biesen W, Veys N, Lameire N *et al.* Why less success of the peritoneal dialysis programmes in Europe? *Nephrol Dial Transplant* 2008; 23: 1478–1481
- Jager KJ, Korevaar JC, Dekker FW *et al.* The effect of contraindications and patient preference on dialysis modality selection in ESRD patients in The Netherlands. *Am J Kidney Dis* 2004; 43: 891–899
- Caskey FJ, Stel VS, Elliott RF *et al.* The EVEREST study: an international collaboration\*. *NDT Plus* 2010; 3: 28–36
- Caskey FJ, Kramer A, Elliott RF *et al.* Global variation in renal replacement therapy for end-stage renal disease. *Nephrol Dial Transplant* 2011; 26: 2604–2610
- Kramer A, Stel VS, Caskey FJ *et al.* Exploring the association between macroeconomic indicators and dialysis mortality. *Clin J Am Soc Nephrol* 2012; 7: 1655–1663
- Jager KJ, Zoccali C, Macleod A *et al.* Confounding: what it is and how to deal with it. *Kidney Int* 2008; 73: 256–260
- Kleinbaum DG. *Applied Regression Analysis and Other Multivariable Methods*. Pacific Grove: Duxbury Press, 1998, 389–390
- Fox J, Monette G. Generalized collinearity diagnostics. *J Am Stat Assoc* 1992; 87: 178–183
- de Jager DJ, Grootendorst DC, Jager KJ *et al.* Cardiovascular and noncardiovascular mortality among patients starting dialysis. *JAMA* 2009; 302: 1782–1789
- Liem YS, Wong JB, Hunink MG *et al.* Comparison of hemodialysis and peritoneal dialysis survival in The Netherlands. *Kidney Int* 2007; 71: 153–158
- Vonesh EF, Snyder JJ, Foley RN *et al.* The differential impact of risk factors on mortality in hemodialysis and peritoneal dialysis. *Kidney Int* 2004; 66: 2389–2401
- Xue JL, Everson SE, Constantini EG *et al.* Peritoneal and hemodialysis: II. Mortality risk associated with initial patient characteristics. *Kidney Int* 2002; 61: 741–746
- Miskulin DC, Meyer KB, Martin AA *et al.* Comorbidity and its change predict survival in incident dialysis patients. *Am J Kidney Dis* 2003; 41: 149–161
- van Manen JG, van Dijk PC, Stel VS *et al.* Confounding effect of comorbidity in survival studies in patients on renal replacement therapy. *Nephrol Dial Transplant* 2007; 22: 187–195

39. Mehrotra R, Kermah D, Fried L *et al*. Chronic peritoneal dialysis in the United States: declining utilization despite improving outcomes. *J Am Soc Nephrol* 2007; 18: 2781–2788
40. Bouvier N, Durand PY, Testa A *et al*. Regional discrepancies in peritoneal dialysis utilization in France: the role of the nephrologist's opinion about peritoneal dialysis. *Nephrol Dial Transplant* 2009; 24: 1293–1297
41. Castledine C, Gilg J, Rogers C *et al*. UK Renal Registry 13th Annual Report (December 2010): Chapter 15: UK renal centre survey results 2010: RRT incidence and use of home dialysis modalities. *Nephron Clin Pract* 2011; 119: c255–c267
42. Mehrotra R, Khawar O, Duong U *et al*. Ownership patterns of dialysis units and peritoneal dialysis in the United States: utilization and outcomes. *Am J Kidney Dis* 2009; 54: 289–298
43. Mignon F, Michel C, Viron B. Why so much disparity of PD in Europe? *Nephrol Dial Transplant* 1998; 13: 1114–1117
44. Wauters JP, Uehlinger D. Non-medical factors influencing peritoneal dialysis utilization: the Swiss experience. *Nephrol Dial Transplant* 2004; 19: 1363–1367
45. Li PK, Chow KM. The cost barrier to peritoneal dialysis in the developing world—an Asian perspective. *Perit Dial Int* 2001; 21: S307–S313
46. Slade EP, Anderson GF. The relationship between per capita income and diffusion of medical technologies. *Health Policy* 2001; 58: 1–14
47. MacGregor MS, Agar JW, Blagg CR. Home haemodialysis—international trends and variation. *Nephrol Dial Transplant* 2006; 21: 1934–1945
48. van Biesen W, Lameire N, Peeters P *et al*. Belgium's mixed private/public health care system and its impact on the cost of end-stage renal disease. *Int J Health Care Finance Econ* 2007; 7: 133–148
49. Diaz-Buxo JA, Crawford-Bonadio TL, St PD *et al*. Establishing a successful home dialysis program. *Blood Purif* 2006; 24: 22–27
50. Mendelssohn DC, Langlois N, Blake PG. Peritoneal dialysis in Ontario: a natural experiment in physician reimbursement methodology. *Perit Dial Int* 2004; 24: 531–537
51. Golper TA, Saxena AB, Piraino B *et al*. Systematic barriers to the effective delivery of home dialysis in the United States: a report from the public policy/advocacy committee of the north American chapter of the international society for peritoneal dialysis. *Am J Kidney Dis* 2011; 58: 879–885
52. Brown EA, Johansson L, Farrington K *et al*. Broadening options for long-term dialysis in the elderly (BOLDE): differences in quality of life on peritoneal dialysis compared to haemodialysis for older patients. *Nephrol Dial Transplant* 2010; 25: 3755–3763
53. Couchoud C, Moranne O, Frimat L *et al*. Associations between comorbidities, treatment choice and outcome in the elderly with end-stage renal disease. *Nephrol Dial Transplant* 2007; 22: 3246–3254
54. O'Hare AM, Johansen KL, Rodriguez RA. Dialysis and kidney transplantation among patients living in rural areas of the United States. *Kidney Int* 2006; 69: 343–349
55. ERA-EDTA Registry. ERA-EDTA Registry Annual Report 2009. Academic Medical Center, Department of Medical Informatics, Amsterdam, The Netherlands, 2011
56. Jain AK, Blake P, Cordy P *et al*. Global trends in rates of peritoneal dialysis. *J Am Soc Nephrol* 2012; 23: 533–544
57. Department of Health. Update on best practice tariffs 2011 13-12-2011
58. Report of the Delegates. National Summit on Home Dialysis Policy. 25-4-2012. Washington, DC
59. Earle KK, Porter KA, Ostberg J *et al*. Variation in the progression of diabetic nephropathy according to racial origin. *Nephrol Dial Transplant* 2001; 16: 286–290
60. JS Gujral ABJINRJB. The prevalence of chronic renal failure in known diabetic and non-diabetic White Caucasians and South Asians. *Practical Diabetes Int* 1997; 14: 71–74
61. Docteur E, Oxley H. Health-care systems: lessons from the reform experience. *OECD* 2003; 28: 1–94
62. Durand PY, Verger C. The state of peritoneal dialysis in France. *Perit Dial Int* 2006; 26: 654–657

Received for publication: 16.8.2012; Accepted in revised form: 4.2.2013
